# Supplementary material
Source: publisher site journal article supplement (https://www.dovepress.com/article/459819)
Supplement: Supplementary file 1 [file get_supplementary_file.php]

## *Supplementary Material*

**Supplementary Table S1.** The detail information of GEO datasets.

| <b>GEO</b> | <b>Platform</b> | <b>CD</b> | <b>Control</b> |
|------------|-----------------|-----------|----------------|
| GSE93624   | GPL11154        | 210       | 35             |
| GSE57945   | GPL11154        | 218       | 48             |
| GSE123141  | GPL16791        | 9         | 9              |
| GSE179285  | GPL6480         | 47        | 31             |
| GSE126124  | GPL6244         | 37        | 19             |
| GSE16879   | GPL570          | 73        | 13             |
| GSE3365    | GPL96           | 59        | 42             |
| GSE193677  | GPL16791        | 1151      | 455            |

**Supplementary Table S2.** Primer sequence for qPCR.

| <b>Gene</b> | <b>Forward Primer</b>    | <b>Reverse Primer</b>   |
|-------------|--------------------------|-------------------------|
| FPR1        | GCTGGCTACATCGTTCTGGATG   | GTTTCATGCGGAAACCAGCCAC  |
| CD86        | ACGTATTGGAAGGAGATTACAGCT | TCTGTCAGCGTTACTATCCCGC  |
| IL1 $\beta$ | TGGACCTTCCAGGATGAGGACA   | GTTTCATCTCGGAGCCTGTAGTG |

**Supplementary Table S3.** The AUC of each model.

| Combined model            | GSE93624 | GSE57945 | GSE179285 | GSE16879 | GSE126124 |
|---------------------------|----------|----------|-----------|----------|-----------|
| Lasso+Stepglm[both]       | 0.965    | 0.928    | 0.969     | 0.943    | 0.952     |
| SVM                       | 0.836    | 0.616    | 0.500     | 0.528    | 0.526     |
| glmBoost+SVM              | 0.824    | 0.607    | 0.500     | 0.528    | 0.526     |
| Ridge                     | 0.965    | 0.928    | 0.972     | 0.925    | 0.954     |
| Lasso+SVM                 | 0.824    | 0.619    | 0.500     | 0.528    | 0.526     |
| glmBoost+Ridge            | 0.965    | 0.928    | 0.972     | 0.925    | 0.954     |
| Enet[alpha=0.1]           | 0.965    | 0.929    | 0.970     | 0.933    | 0.952     |
| glmBoost+Enet[alpha=0.1]  | 0.966    | 0.929    | 0.970     | 0.932    | 0.953     |
| Enet[alpha=0.2]           | 0.966    | 0.929    | 0.970     | 0.932    | 0.952     |
| Enet[alpha=0.3]           | 0.965    | 0.929    | 0.970     | 0.933    | 0.952     |
| glmBoost+Enet[alpha=0.3]  | 0.966    | 0.929    | 0.970     | 0.934    | 0.952     |
| glmBoost+Enet[alpha=0.2]  | 0.966    | 0.929    | 0.970     | 0.933    | 0.952     |
| Enet[alpha=0.4]           | 0.965    | 0.929    | 0.970     | 0.933    | 0.952     |
| glmBoost+Enet[alpha=0.4]  | 0.965    | 0.929    | 0.970     | 0.933    | 0.952     |
| Lasso+glmBoost            | 0.965    | 0.927    | 0.969     | 0.947    | 0.952     |
| Enet[alpha=0.5]           | 0.965    | 0.929    | 0.969     | 0.936    | 0.953     |
| glmBoost                  | 0.965    | 0.927    | 0.969     | 0.947    | 0.952     |
| glmBoost+Enet[alpha=0.5]  | 0.965    | 0.929    | 0.970     | 0.935    | 0.953     |
| Enet[alpha=0.6]           | 0.965    | 0.929    | 0.970     | 0.935    | 0.953     |
| glmBoost+Enet[alpha=0.6]  | 0.965    | 0.929    | 0.969     | 0.936    | 0.953     |
| glmBoost+Enet[alpha=0.7]  | 0.966    | 0.929    | 0.969     | 0.938    | 0.952     |
| glmBoost+Enet[alpha=0.8]  | 0.965    | 0.929    | 0.969     | 0.941    | 0.952     |
| Enet[alpha=0.8]           | 0.965    | 0.929    | 0.969     | 0.941    | 0.952     |
| Enet[alpha=0.9]           | 0.965    | 0.928    | 0.969     | 0.943    | 0.952     |
| Lasso                     | 0.965    | 0.927    | 0.969     | 0.945    | 0.950     |
| Enet[alpha=0.7]           | 0.966    | 0.929    | 0.969     | 0.938    | 0.952     |
| glmBoost+Enet[alpha=0.9]  | 0.965    | 0.928    | 0.969     | 0.943    | 0.952     |
| glmBoost+Lasso            | 0.965    | 0.928    | 0.969     | 0.945    | 0.950     |
| Lasso+plsRglm             | 0.965    | 0.928    | 0.973     | 0.920    | 0.954     |
| glmBoost+plsRglm          | 0.965    | 0.928    | 0.973     | 0.920    | 0.954     |
| glmBoost+Stepglm[forward] | 0.965    | 0.928    | 0.969     | 0.943    | 0.952     |
| Lasso+Stepglm[forward]    | 0.965    | 0.928    | 0.969     | 0.943    | 0.952     |
| RF+SVM                    | 0.836    | 0.616    | 0.500     | 0.528    | 0.526     |
| Stepglm[forward]          | 0.965    | 0.928    | 0.969     | 0.943    | 0.952     |
| plsRglm                   | 0.965    | 0.928    | 0.973     | 0.920    | 0.954     |
| RF+Ridge                  | 0.965    | 0.928    | 0.972     | 0.925    | 0.954     |
| RF+Enet[alpha=0.1]        | 0.965    | 0.929    | 0.970     | 0.933    | 0.952     |
| RF+plsRglm                | 0.965    | 0.928    | 0.973     | 0.920    | 0.954     |
| RF+Stepglm[forward]       | 0.965    | 0.928    | 0.969     | 0.943    | 0.952     |
| RF+Enet[alpha=0.2]        | 0.966    | 0.929    | 0.970     | 0.932    | 0.953     |
| RF+Enet[alpha=0.3]        | 0.966    | 0.929    | 0.970     | 0.934    | 0.952     |

|                                   |       |       |       |       |       |
|-----------------------------------|-------|-------|-------|-------|-------|
| RF+Enet[alpha=0.6]                | 0.966 | 0.929 | 0.970 | 0.934 | 0.952 |
| RF+Lasso                          | 0.965 | 0.927 | 0.969 | 0.946 | 0.952 |
| RF+Enet[alpha=0.7]                | 0.965 | 0.929 | 0.969 | 0.939 | 0.952 |
| RF+Enet[alpha=0.5]                | 0.965 | 0.929 | 0.970 | 0.935 | 0.953 |
| RF+glmBoost                       | 0.965 | 0.927 | 0.969 | 0.947 | 0.952 |
| RF+Enet[alpha=0.9]                | 0.965 | 0.928 | 0.969 | 0.943 | 0.952 |
| RF+Enet[alpha=0.4]                | 0.966 | 0.929 | 0.970 | 0.934 | 0.952 |
| RF+Enet[alpha=0.8]                | 0.965 | 0.929 | 0.969 | 0.941 | 0.952 |
| RF+Stepglm[both]                  | 0.965 | 0.928 | 0.969 | 0.943 | 0.952 |
| RF+Stepglm[backward]              | 0.965 | 0.928 | 0.969 | 0.943 | 0.952 |
| Stepglm[both]+Ridge               | 0.965 | 0.928 | 0.972 | 0.925 | 0.954 |
| Stepglm[backward]+Ridge           | 0.965 | 0.928 | 0.972 | 0.925 | 0.954 |
| Stepglm[both]+plsRglm             | 0.965 | 0.928 | 0.973 | 0.920 | 0.954 |
| Stepglm[backward]+plsRglm         | 0.965 | 0.928 | 0.973 | 0.920 | 0.954 |
| Stepglm[both]+Enet[alpha=0.9]     | 0.965 | 0.928 | 0.969 | 0.943 | 0.952 |
| Stepglm[backward]+Enet[alpha=0.9] | 0.965 | 0.928 | 0.969 | 0.943 | 0.952 |
| Stepglm[both]+Enet[alpha=0.1]     | 0.966 | 0.929 | 0.970 | 0.932 | 0.953 |
| Stepglm[backward]+Enet[alpha=0.1] | 0.966 | 0.929 | 0.970 | 0.932 | 0.953 |
| Stepglm[both]+Enet[alpha=0.8]     | 0.965 | 0.929 | 0.969 | 0.941 | 0.952 |
| Stepglm[backward]+Enet[alpha=0.8] | 0.965 | 0.928 | 0.969 | 0.942 | 0.952 |
| Stepglm[both]+Enet[alpha=0.2]     | 0.966 | 0.929 | 0.970 | 0.932 | 0.953 |
| Stepglm[backward]+Enet[alpha=0.2] | 0.966 | 0.929 | 0.970 | 0.932 | 0.953 |
| Stepglm[both]+Lasso               | 0.965 | 0.927 | 0.969 | 0.945 | 0.950 |
| Stepglm[backward]+Lasso           | 0.965 | 0.928 | 0.969 | 0.945 | 0.950 |
| Stepglm[both]+Enet[alpha=0.6]     | 0.965 | 0.929 | 0.969 | 0.936 | 0.953 |
| Stepglm[backward]+Enet[alpha=0.6] | 0.965 | 0.929 | 0.969 | 0.936 | 0.953 |
| glmBoost+GBM                      | 0.989 | 0.931 | 0.965 | 0.933 | 0.932 |
| Stepglm[both]+Enet[alpha=0.7]     | 0.966 | 0.929 | 0.969 | 0.938 | 0.952 |
| Stepglm[backward]+Enet[alpha=0.7] | 0.965 | 0.929 | 0.969 | 0.939 | 0.952 |
| Lasso+Stepglm[backward]           | 0.965 | 0.928 | 0.969 | 0.943 | 0.952 |
| Stepglm[both]                     | 0.965 | 0.928 | 0.969 | 0.943 | 0.952 |
| Stepglm[backward]                 | 0.965 | 0.928 | 0.969 | 0.943 | 0.952 |
| glmBoost+Stepglm[both]            | 0.965 | 0.928 | 0.969 | 0.943 | 0.952 |
| glmBoost+Stepglm[backward]        | 0.965 | 0.928 | 0.969 | 0.943 | 0.952 |
| Stepglm[both]+Enet[alpha=0.4]     | 0.965 | 0.929 | 0.970 | 0.933 | 0.952 |
| Stepglm[backward]+Enet[alpha=0.4] | 0.965 | 0.929 | 0.970 | 0.935 | 0.953 |
| Stepglm[both]+Enet[alpha=0.3]     | 0.966 | 0.929 | 0.970 | 0.932 | 0.953 |
| Stepglm[backward]+Enet[alpha=0.3] | 0.965 | 0.929 | 0.970 | 0.933 | 0.952 |
| Stepglm[both]+glmBoost            | 0.965 | 0.927 | 0.969 | 0.947 | 0.952 |
| Stepglm[backward]+glmBoost        | 0.965 | 0.927 | 0.969 | 0.947 | 0.952 |
| Stepglm[both]+Enet[alpha=0.5]     | 0.966 | 0.929 | 0.970 | 0.935 | 0.952 |
| Stepglm[backward]+Enet[alpha=0.5] | 0.966 | 0.929 | 0.969 | 0.938 | 0.952 |
| glmBoost+RF                       | 0.993 | 0.895 | 0.927 | 0.947 | 0.936 |

|                              |       |       |       |       |       |
|------------------------------|-------|-------|-------|-------|-------|
| RF                           | 0.993 | 0.894 | 0.926 | 0.946 | 0.935 |
| Lasso+GBM                    | 0.985 | 0.931 | 0.965 | 0.937 | 0.932 |
| RF+GBM                       | 0.988 | 0.931 | 0.964 | 0.937 | 0.930 |
| GBM                          | 0.984 | 0.932 | 0.967 | 0.942 | 0.930 |
| Stepglm[both]+SVM            | 0.824 | 0.619 | 0.500 | 0.528 | 0.526 |
| Stepglm[backward]+SVM        | 0.836 | 0.616 | 0.500 | 0.528 | 0.526 |
| Lasso+RF                     | 0.993 | 0.895 | 0.926 | 0.947 | 0.936 |
| Stepglm[both]+GBM            | 0.987 | 0.932 | 0.963 | 0.937 | 0.927 |
| Stepglm[backward]+GBM        | 0.986 | 0.931 | 0.966 | 0.943 | 0.930 |
| Stepglm[both]+RF             | 0.993 | 0.895 | 0.927 | 0.947 | 0.936 |
| LDA                          | 0.965 | 0.927 | 0.968 | 0.946 | 0.949 |
| glmBoost+LDA                 | 0.965 | 0.927 | 0.968 | 0.946 | 0.949 |
| RF+LDA                       | 0.965 | 0.927 | 0.968 | 0.946 | 0.949 |
| Stepglm[both]+LDA            | 0.965 | 0.927 | 0.968 | 0.946 | 0.949 |
| Stepglm[backward]+LDA        | 0.965 | 0.927 | 0.968 | 0.946 | 0.949 |
| Lasso+LDA                    | 0.965 | 0.927 | 0.968 | 0.946 | 0.949 |
| Stepglm[backward]+RF         | 0.993 | 0.895 | 0.925 | 0.946 | 0.936 |
| XGBoost                      | 0.991 | 0.917 | 0.933 | 0.963 | 0.935 |
| Lasso+XGBoost                | 0.988 | 0.914 | 0.934 | 0.954 | 0.940 |
| glmBoost+XGBoost             | 0.978 | 0.891 | 0.907 | 0.954 | 0.911 |
| RF+XGBoost                   | 0.993 | 0.916 | 0.933 | 0.943 | 0.930 |
| Stepglm[both]+XGBoost        | 0.990 | 0.915 | 0.933 | 0.963 | 0.935 |
| Stepglm[backward]+XGBoost    | 0.990 | 0.915 | 0.933 | 0.963 | 0.935 |
| NaiveBayes                   | 0.967 | 0.925 | 0.972 | 0.926 | 0.954 |
| Lasso+NaiveBayes             | 0.967 | 0.925 | 0.972 | 0.926 | 0.954 |
| glmBoost+NaiveBayes          | 0.967 | 0.925 | 0.972 | 0.926 | 0.954 |
| RF+NaiveBayes                | 0.967 | 0.925 | 0.972 | 0.926 | 0.954 |
| Stepglm[both]+NaiveBayes     | 0.967 | 0.925 | 0.972 | 0.926 | 0.954 |
| Stepglm[backward]+NaiveBayes | 0.967 | 0.925 | 0.972 | 0.926 | 0.954 |

**Supplementary Table S4.** The published signatures and biomarkers from CD studies

| <b>Ensembl</b>  | <b>Model</b> | <b>PMID</b> | <b>Author</b> | <b>Gene name</b> |
|-----------------|--------------|-------------|---------------|------------------|
| ENSG00000167984 | Wu-FI        | 36685554    | Wu            | NLRC3            |
| ENSG00000154451 | Wu-FI        | 36685554    | Wu            | GBP5             |
| ENSG00000005100 | Wu-FI        | 36685554    | Wu            | DHX33            |
| ENSG00000140368 | Wu-FI        | 36685554    | Wu            | PSTPIP1          |
| ENSG00000109320 | Wu-FI        | 36685554    | Wu            | NFKB1            |
| ENSG00000136810 | Wu-FI        | 36685554    | Wu            | TXN              |
| ENSG00000103313 | Wu-FI        | 36685554    | Wu            | MEFV             |
| ENSG00000077150 | Wu-FI        | 36685554    | Wu            | NFKB2            |
| ENSG00000174130 | Wu-FI        | 36685554    | Wu            | TLR6             |
| ENSG00000137752 | Wu-FI        | 36685554    | Wu            | CASP1            |
| ENSG00000110218 | Wu-FI        | 36685554    | Wu            | PANX1            |
| ENSG00000173039 | Wu-FI        | 36685554    | Wu            | RELA             |
| ENSG00000096384 | Wu-FI        | 36685554    | Wu            | HSP90AB1         |
| ENSG00000105483 | Wu-FI        | 36685554    | Wu            | CARD8            |
| ENSG00000232810 | Dai-IJMS     | 37047025    | Dai           | TNF              |
| ENSG0000023445  | Dai-IJMS     | 37047025    | Dai           | BIRC3            |
| ENSG00000135046 | Dai-IJMS     | 37047025    | Dai           | ANXA1            |
| ENSG00000050730 | Dai-IJMS     | 37047025    | Dai           | TNIP3            |
| ENSG00000134285 | Dai-IJMS     | 37047025    | Dai           | FKBP11           |
| ENSG00000085265 | Chen-JTM     | 36932401    | Chen          | FCN1             |
| ENSG00000011422 | Zhang-CMMM   | 36643579    | Zhang         | PLAUR            |
| ENSG00000122884 | Ye-FIG       | 37428395    | Ye            | P4HA1            |
| ENSG00000140650 | Ye-FIG       | 37428395    | Ye            | PMM2             |
| ENSG00000169245 | Huang-FI     | 37622114    | Huang         | CXCL10           |
| ENSG00000108821 | Huang-FI     | 37622114    | Huang         | COL1A1           |

Note: Data from these studies.<sup>30-35</sup>

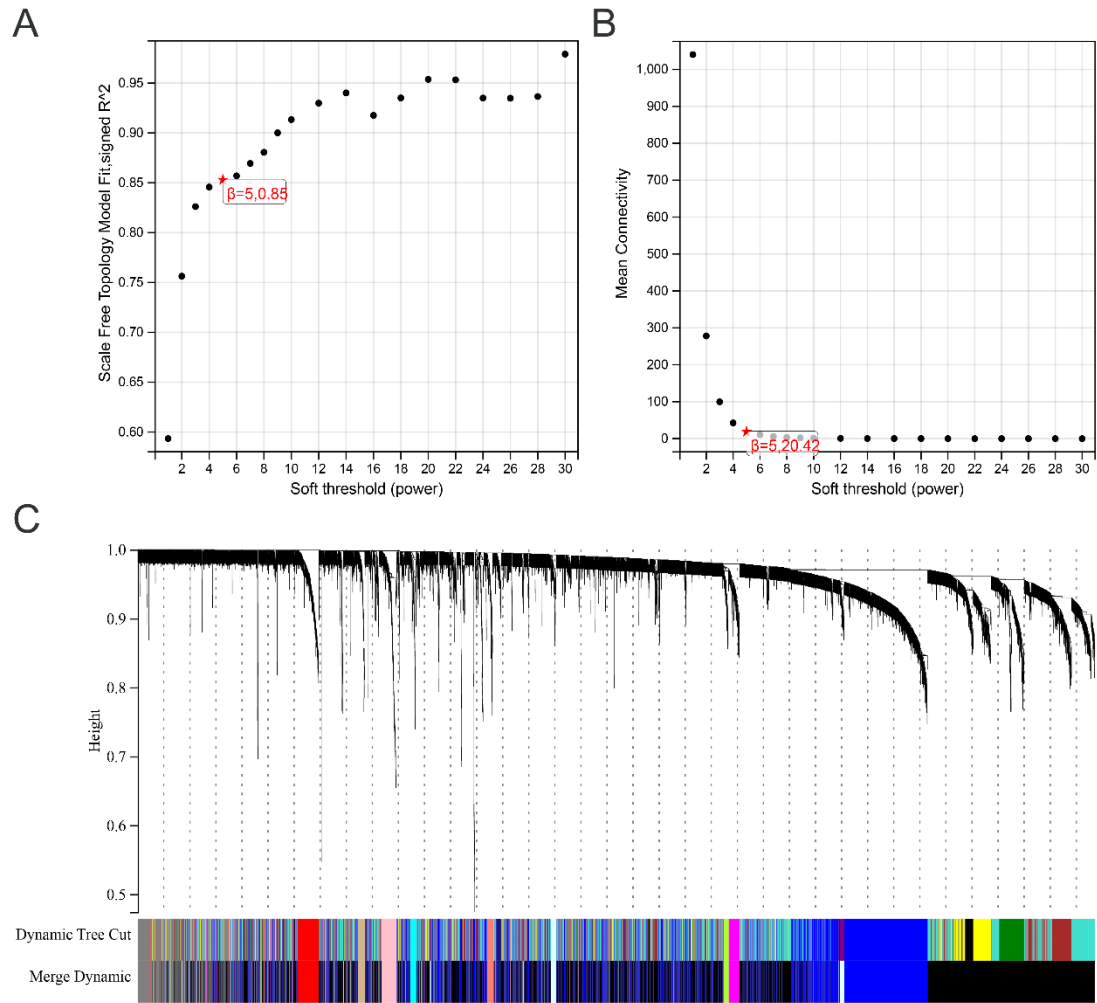

**Supplementary Figure S1.** WGCNA in GSE93624. (A-B) WGCNA soft threshold  $\beta$  setting. (C) Resulting gene dendrograms.

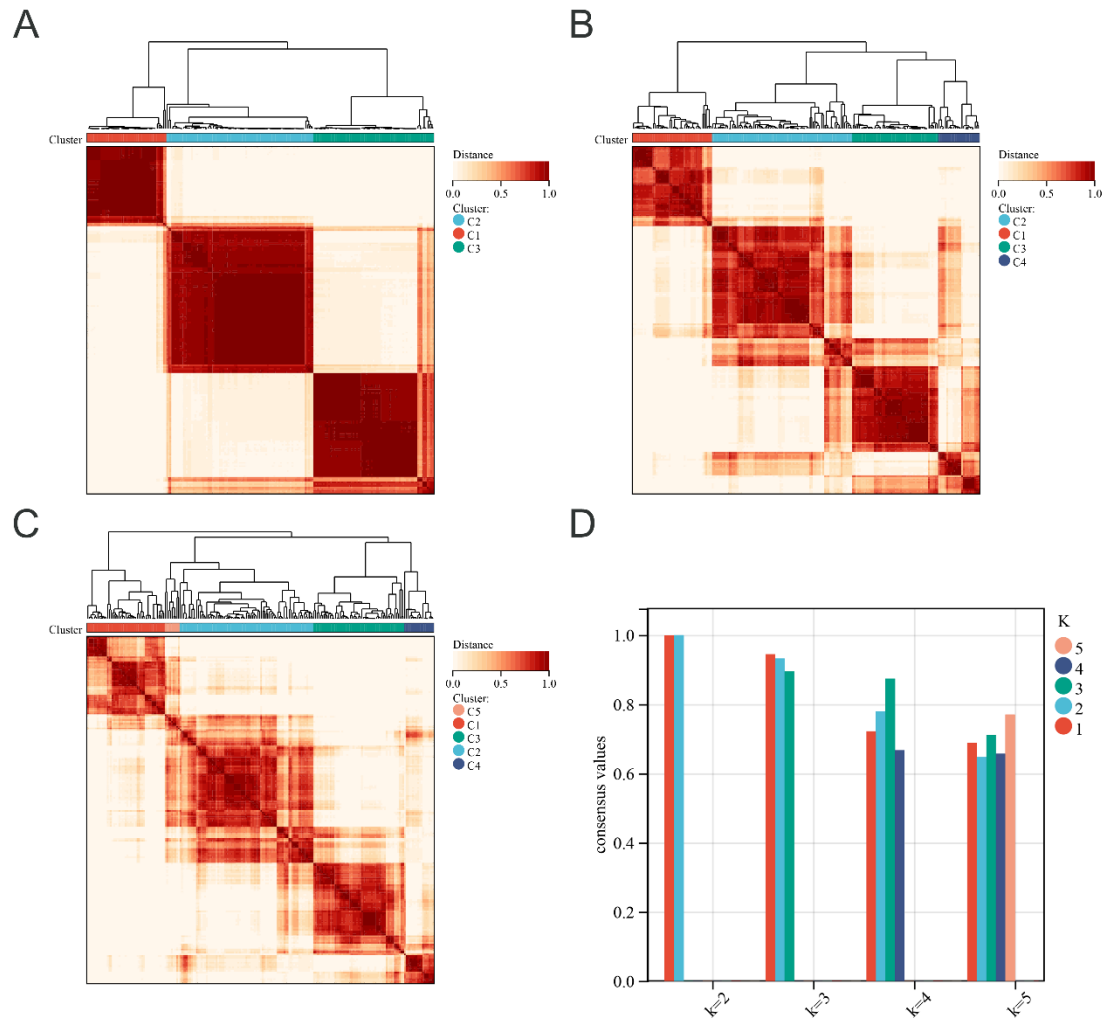

**Supplementary Figure S2.** Clustering for MRGs in GSE93624. (A-C) Consensus clustering matrices in CD merged datasets ( $k=3-5$ ). (D) The bar plots represent the consensus scores for subtypes with  $k=2-5$ .



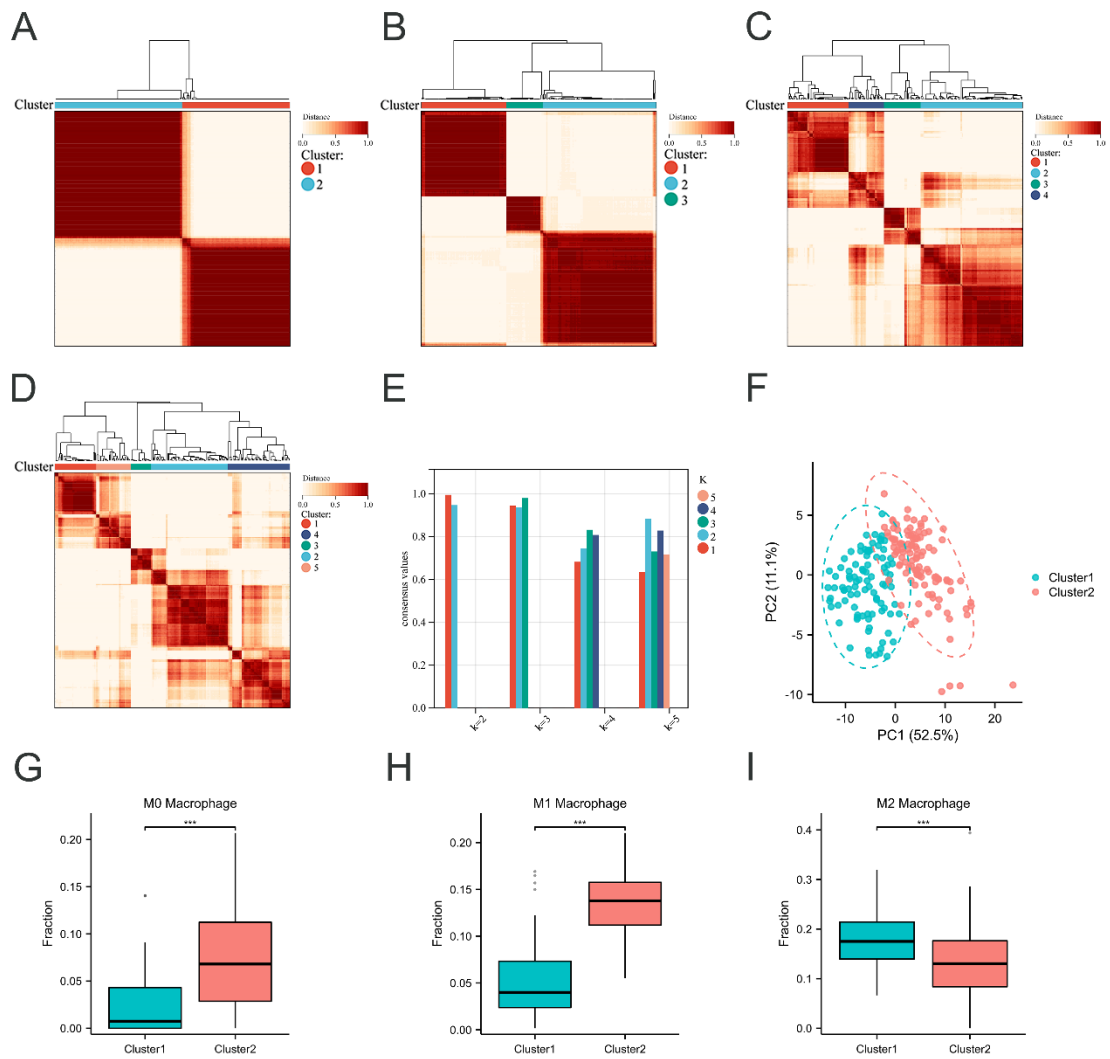

**Supplementary Figure S3.** Clustering for MRGs in GSE57945. (A-D) Consensus clustering matrices in CD merged datasets ( $k=2-5$ ). (E) The bar plots represent the consensus scores for subtypes with  $k=2-5$ . (F) PCA for the expression of MRGs to distinguish two clusters. (G-I) The infiltration levels of M0, M1, and M2 macrophages in each cluster. (\*\*\*)  $p < 0.001$ .
